# Supplementary material for: Conversion of 12-membered d3- and l3-CoIII3CdII3 metallorings into a 24-membered d3l3-CoIII6CdII6 metalloring
Source: Royal Society of Chemistry journal article supplement (doi:10.1039/c8cc09121h), 2018-12-18
Supplement: c8cc09121h1.pdf [file c8cc09121h1.pdf]

**Electronic Supplementary Information (ESI)**

**Conversion of 12-Membered  $D_3$ - and  $L_3$ - $Co^{III}_3Cd^{II}_3$  Metallorings into a 24-Membered  $D_3L_3$ - $Co^{III}_6Cd^{II}_6$  Metalloring**

Daiki Hayashi, Nobuto Yoshinari, and Takumi Konno\*

*Department of Chemistry, Graduate School of Science, Osaka University, Toyonaka, Osaka 560-0043 (Japan)*

*konno@chem.sci.osaka-u.ac.jp*

## Experimental Section

### Materials.

*N,N'*-ethylenebis(D-penicillamine) (D-H4ebp) and *N,N'*-ethylenebis(L-penicillamine) (L-H4ebp) were prepared from D-penicillamine and L-penicillamine, respectively, *via* 5,5-dimethylthiazolidine-4-carboxylic acid<sup>S1</sup> using a modified synthetic method of *N,N'*-ethylenebis(L-cysteine).<sup>S2</sup> Na<sub>3</sub>[Co(CO<sub>3</sub>)<sub>3</sub>]·3H<sub>2</sub>O was freshly prepared according to the literature method.<sup>S3</sup> Other chemicals and solvents were of commercial reagent grade and used without further purification.

### Preparation of Na[Co(D- or L-ebp)].

This complex has been previously prepared by using [Co(NH<sub>3</sub>)<sub>6</sub>]Cl<sub>3</sub> as a starting complex<sup>S4</sup> but isolated as a double salt containing NaCl, Na[Co(D-ebp)]·0.5NaCl. To avoid contamination with chloride ions, Na<sub>3</sub>[Co(CO<sub>3</sub>)<sub>3</sub>] was used as the starting complex in this study.

An aqueous suspension (30 mL) containing D-H4ebp (300 mg, 0.92 mmol) and Na<sub>3</sub>[Co(CO<sub>3</sub>)<sub>3</sub>]·3H<sub>2</sub>O (350 mg, 0.97 mmol) was stirred at room temperature for 1 h, which gave a brown solution. The brown solution was evaporated to dryness, and then methanol (8 mL) and 1-hexanol (8 mL) were added to the residue to give a brown suspension. After filtration, 1-hexanol (12 mL) was added to the filtrate. The brown solution was concentrated to a small volume to give a dark brown powder. The brown powder was collected by filtration, washed with diethyl ether, and then dried in vacuo. Yield: 245 mg (57 %). Anal. Calcd for Na[Co(D-ebp)]·3.5H<sub>2</sub>O = C<sub>12</sub>H<sub>27</sub>CoN<sub>2</sub>NaO<sub>7.5</sub>S<sub>2</sub>: C, 30.97; H, 5.85; N, 6.02 %. Found: C, 30.62; H, 5.57; N, 6.00 %. <sup>1</sup>H NMR spectrum in D<sub>2</sub>O (δ, ppm from DSS): 3.54 (s, 2H), 3.51 (d, *J* = 8.6 Hz, 2H), 2.93 (d, *J* = 8.6 Hz, 2H), 1.79 (s, 6H), 1.29 (s, 6H). Diffuse reflection spectrum (λ, nm): 538. Solid CD spectrum (λ, nm): 405 (–), 453 (–), 547 (+), 669 (+)

A similar reaction using L-H4ebp, instead of D-H4ebp, gave Na[Co(L-ebp)]. Yield: 55 %. Anal. Calcd for Na[Co(L-ebp)]·3.5H<sub>2</sub>O = C<sub>12</sub>H<sub>27</sub>CoN<sub>2</sub>NaO<sub>7.5</sub>S<sub>2</sub>: C, 30.97; H, 5.85; N, 6.02 %. Found: C, 30.91; H, 5.87; N, 5.81 %. Diffuse reflection spectrum (λ, nm): 539. Solid CD (λ, nm): 400 (+), 460 (+), 558 (–), 670 (–)

### Preparation of [Cd<sub>3</sub>{Co(D-ebp)}<sub>3</sub>I<sub>3</sub>] (D<sub>3</sub>-1<sub>I</sub>) and [Cd<sub>3</sub>{Co(L-ebp)}<sub>3</sub>I<sub>3</sub>] (L<sub>3</sub>-1<sub>I</sub>).

To a brown solution containing Na[Co(D-ebp)]·3.5H<sub>2</sub>O (50 mg, 0.11 mmol) in H<sub>2</sub>O (5 mL) was added a colourless solution of CdI<sub>2</sub> (59 mg, 0.16 mmol) in H<sub>2</sub>O (4 mL). The brown solution was slowly evaporated at room temperature for 2 weeks, which gave purple block crystals of D<sub>3</sub>-1<sub>I</sub>, together with a small amount of a white precipitate. The white precipitate was removed by decantation, and the purple crystals were collected by filtration and washed with a small amount of H<sub>2</sub>O. One of the crystals was used for single-crystal X-ray analysis. Yield: 53 mg (73 %). Anal. Calcd for [Cd<sub>3</sub>{Co(D-ebp)}<sub>3</sub>I<sub>3</sub>]·8H<sub>2</sub>O = C<sub>36</sub>H<sub>76</sub>Cd<sub>3</sub>Co<sub>3</sub>I<sub>3</sub>N<sub>6</sub>O<sub>20</sub>S<sub>6</sub>: C, 21.62; H, 3.83; N, 4.20 %. Found: C, 21.63; H, 3.61; N, 4.19 %. Diffuse reflection spectrum (λ, nm): 525. Solid CD spectrum (λ, nm): 438 (–), 525 (+), 612 (–).

A similar reaction using Na[Co(L-ebp)]·3.5H<sub>2</sub>O, instead of Na[Co(D-ebp)]·3.5H<sub>2</sub>O, gave L<sub>3</sub>-1<sub>I</sub>. Yield: 51 %. Anal. Calcd for [Cd<sub>3</sub>{Co(ebp)}<sub>3</sub>I<sub>3</sub>]·8H<sub>2</sub>O = C<sub>36</sub>H<sub>76</sub>Cd<sub>3</sub>Co<sub>3</sub>I<sub>3</sub>N<sub>6</sub>O<sub>20</sub>S<sub>6</sub>: C, 21.62; H, 3.83; N, 4.20 %. Found: C, 21.74; H, 3.61; N, 4.22 %. Diffuse reflection spectrum (λ, nm): 525. Solid CD spectrum (λ, nm): 435 (+), 522 (–), 614 (+).

**Preparation of  $[\text{Cd}_6(\text{H}_2\text{O})_6\{\text{Co}(\text{D-ebp})\}_3\{\text{Co}(\text{L-ebp})\}_3\text{I}_6]$  ( $\text{D}_3\text{L}_3\text{-2I}$ ).****Method A.**

To a brown solution containing  $\text{Na}[\text{Co}(\text{D-ebp})]\cdot 3.5\text{H}_2\text{O}$  (15 mg, 0.033 mmol) and  $\text{Na}[\text{Co}(\text{L-ebp})]\cdot 3.5\text{H}_2\text{O}$  (15 mg, 0.033 mmol) in  $\text{H}_2\text{O}$  (6 mL) was added a colourless solution containing  $\text{CdI}_2$  (72 mg, 0.13 mmol) in  $\text{H}_2\text{O}$  (2 mL). The resulting brown solution was slowly evaporated at room temperature for a week, which gave purple hexagonal plate crystals of  $\text{D}_3\text{L}_3\text{-2I}$ . The crystals were collected by filtration and washed with a small amount of  $\text{H}_2\text{O}$ . One of the crystals was used for single-crystal X-ray analysis. Yield: 29 mg (67 %). Anal. Calcd for  $[\text{Cd}_6(\text{H}_2\text{O})_6\{\text{Co}(\text{epen})\}_6\text{I}_6]\cdot 12\text{H}_2\text{O} = \text{C}_{72}\text{H}_{156}\text{Cd}_6\text{Co}_6\text{I}_6\text{N}_{12}\text{O}_{42}\text{S}_{12}$ : C, 21.42; H, 3.90; N, 4.16 %. Found: C, 21.36; H, 3.72; N, 4.07 %. Diffuse reflection spectrum ( $\lambda$ , nm): 525. Solid CD spectrum: silent.

**Method B.**

$\text{D}_3\text{-1I}$  (10 mg, 5.0  $\mu\text{mol}$ ) and  $\text{L}_3\text{-1I}$  (10 mg, 5.0  $\mu\text{mol}$ ) were dissolved in  $\text{H}_2\text{O}$  (6 mL), which gave a brown solution. To the solution was added a 0.3 M aqueous NaI solution (650  $\mu\text{L}$ , 195  $\mu\text{mol}$ ). The mixture was slowly evaporated at room temperature for 3 weeks, which gave purple hexagonal plate crystals of  $\text{D}_3\text{L}_3\text{-2I}$ . The crystals were collected by filtration and washed with a small amount of  $\text{H}_2\text{O}$ . Yield: 17 mg (84 %).

**Preparation of  $[\text{Cd}_2(\text{H}_2\text{O})_2\{\text{Co}(\text{D-ebp})\}_2\{\text{Co}(\text{L-ebp})\}_2]$  ( $\text{D}_2\text{L}_2\text{-3}$ ).**

$\text{D}_3\text{-1I}$  (10 mg, 5.0  $\mu\text{mol}$ ) and  $\text{L}_3\text{-1I}$  (10 mg, 5.0  $\mu\text{mol}$ ) were dissolved in  $\text{H}_2\text{O}$  (6 mL), which gave a brown solution. The mixture was slowly evaporated at room temperature for 2 weeks, which gave purple hexagonal plate crystals of  $\text{D}_3\text{L}_3\text{-2I}$  and green block crystals of  $\text{D}_2\text{L}_2\text{-3}$ . The product was recrystallized from  $\text{H}_2\text{O}$ , which gave only green block crystals of  $\text{D}_2\text{L}_2\text{-3}$ . The green crystals were collected by filtration and washed with a small amount of  $\text{H}_2\text{O}$ . One of the green crystals was used for single-crystal X-ray analysis. Yield: 3 mg (20 %). Found: C, 30.37; H, 5.06; N, 5.88 %. Calcd for  $[\text{Cd}_2\{\text{Co}(\text{ebp})\}_4]\cdot 9\text{H}_2\text{O} = \text{C}_{48}\text{H}_{98}\text{Cd}_2\text{Co}_4\text{N}_8\text{O}_{25}\text{S}_8$ : C, 30.27; H, 5.19; N, 5.88 %. Diffuse reflection spectrum ( $\lambda$ , nm): 543. Solid CD spectrum: silent. Fluorescence X-ray analysis: Cd, Co, S. The bulk purity of the sample was confirmed by powder X-ray diffraction measurement.

**Preparation of  $[\text{Cd}_3\{\text{Co}(\text{D-ebp})\}_3\text{Br}_3]$  ( $\text{D}_3\text{-1Br}$ ) and  $[\text{Cd}_3\{\text{Co}(\text{L-ebp})\}_3\text{Br}_3]$  ( $\text{L}_3\text{-1Br}$ ).**

To a brown solution containing  $\text{Na}[\text{Co}(\text{D-ebp})]\cdot 3.5\text{H}_2\text{O}$  (50 mg, 0.11 mmol) in  $\text{H}_2\text{O}$  (6 mL) was added  $\text{CdBr}_2$  (32 mg, 0.12 mmol). After stirring at room temperature for 3 days, a small amount of a white precipitate was filtered off. The brown filtrate was slowly evaporated at room temperature for 2 weeks. The resulting purple block crystals of  $\text{D}_3\text{-1Br}$  were collected by filtration and washed with a small amount of  $\text{H}_2\text{O}$ . One of the crystals was used for single-crystal X-ray analysis. Yield: 49 mg (74 %). Anal. Calcd for  $[\text{Cd}_3\{\text{Co}(\text{ebp})\}_3\text{Br}_3]\cdot 8\text{H}_2\text{O} = \text{C}_{36}\text{H}_{76}\text{Br}_3\text{Cd}_3\text{Co}_3\text{N}_6\text{O}_{20}\text{S}_6$ : C, 23.26; H, 4.12; N, 4.52 %. Found: C, 23.41; H, 3.99; N, 4.63 %. Diffuse reflection spectrum ( $\lambda$ , nm): 523. Solid CD spectrum ( $\lambda$ , nm): 435 (–), 523 (+), 610 (–).

A similar reaction using  $\text{Na}[\text{Co}(\text{L-ebp})]\cdot 3.5\text{H}_2\text{O}$  instead of  $\text{Na}[\text{Co}(\text{D-ebp})]\cdot 3.5\text{H}_2\text{O}$  gave  $\text{L}_3\text{-1Br}$ . Yield: 62 %. Anal. Calcd for  $[\text{Cd}_3\{\text{Co}(\text{ebp})\}_3\text{Br}_3]\cdot 8\text{H}_2\text{O} = \text{C}_{36}\text{H}_{76}\text{Br}_3\text{Cd}_3\text{Co}_3\text{N}_6\text{O}_{20}\text{S}_6$ : C, 23.26; H, 4.12; N, 4.52 %. Found: C, 23.13; H, 4.03; N, 4.53 %. Diffuse reflection spectrum ( $\lambda$ ,

nm): 526. Solid CD spectrum ( $\lambda$ , nm): 434 (+), 525 (–), 610 (+).

### **Preparation of $[\text{Cd}_6(\text{H}_2\text{O})_6\{\text{Co}(\text{D-ebp})\}_3\{\text{Co}(\text{L-ebp})\}_3\text{Br}_6]$ ( $\text{D}_3\text{L}_3\text{-2Br}$ ).**

#### **Method A.**

To a brown solution containing  $\text{Na}[\text{Co}(\text{D-ebp})]\cdot 3.5\text{H}_2\text{O}$  (15 mg, 0.033 mmol) and  $\text{Na}[\text{Co}(\text{L-ebp})]\cdot 3.5\text{H}_2\text{O}$  (15 mg, 0.033 mmol) in  $\text{H}_2\text{O}$  (6 mL) was added a colourless solution containing  $\text{CdBr}_2$  (54 mg, 0.20 mmol) in  $\text{H}_2\text{O}$  (2 mL). The mixture was slowly evaporated at room temperature for 5 days. The resulting purple hexagonal plate crystals of  $\text{D}_3\text{L}_3\text{-2Br}$  were collected by filtration and washed with a small amount of  $\text{H}_2\text{O}$ . One of the crystals was used for single-crystal X-ray analysis. Yield: 29 mg (72 %). Anal. Calcd for  $[\text{Cd}_6(\text{H}_2\text{O})_6\{\text{Co}(\text{ebp})\}_6\text{Br}_6]\cdot 12\text{H}_2\text{O} = \text{C}_{72}\text{H}_{156}\text{Br}_6\text{Cd}_6\text{Co}_6\text{N}_{12}\text{O}_{42}\text{S}_{12}$ : C, 23.03; H, 4.19; N, 4.48 %. Found: C, 22.96; H, 4.04; N, 4.50 %. Diffuse reflection spectrum ( $\lambda$ , nm): 525. Solid CD spectrum: silent.

#### **Method B.**

$\text{D}_3\text{-1Br}$  (10 mg, 5.4  $\mu\text{mol}$ ) and  $\text{L}_3\text{-1Br}$  (10 mg, 5.4  $\mu\text{mol}$ ) were dissolved in  $\text{H}_2\text{O}$  (8 mL), which gave a brown solution. To the solution was added 3 M aqueous  $\text{NaBr}$  (70  $\mu\text{L}$ , 210  $\mu\text{mol}$ ). The mixture was slowly evaporated at room temperature for 3 weeks, which gave purple hexagonal plate crystals of  $\text{D}_3\text{L}_3\text{-2Br}$ . The crystals were collected by filtration and washed with a small amount of  $\text{H}_2\text{O}$ . Yield: 15 mg (74 %).

### **Preparation of $[\text{CdCl}\{\text{Co}(\text{D-ebp})\}]_n$ .**

To a brown solution containing  $\text{Na}[\text{Co}(\text{D-ebp})]\cdot 3.5\text{H}_2\text{O}$  (50 mg, 0.11 mmol) in  $\text{H}_2\text{O}$  (3 mL) was added  $\text{CdCl}_2\cdot 2.5\text{H}_2\text{O}$  (24 mg, 0.11 mmol). After stirring at room temperature for 1 day, a small amount of a white precipitate was filtered off. The brown filtrate was slowly evaporated at room temperature for 5 days. The resulting purple block crystals of  $[\text{CdCl}\{\text{Co}(\text{D-ebp})\}]_n$  were collected by filtration and washed with a small amount of  $\text{H}_2\text{O}$ . One of the crystals was used for single-crystal X-ray analysis. Yield: 32 mg (49 %). Anal. Calcd for  $[\text{CdCl}\{\text{Co}(\text{ebp})\}]\cdot 4\text{H}_2\text{O} = \text{C}_{12}\text{H}_{28}\text{CdCoN}_2\text{O}_8\text{S}_2$ : C, 24.05; H, 4.71; N, 4.67 %. Found: C, 24.11; H, 4.43; N, 4.70 %.

### **Preparation of $[\text{Cd}_6(\text{H}_2\text{O})_6\{\text{Co}(\text{D-ebp})\}_3\{\text{Co}(\text{L-ebp})\}_3\text{Cl}_6]$ ( $\text{D}_3\text{L}_3\text{-2Cl}$ ).**

To a brown solution containing  $\text{Na}[\text{Co}(\text{D-ebp})]\cdot 3.5\text{H}_2\text{O}$  (15 mg, 0.033 mmol) and  $\text{Na}[\text{Co}(\text{L-ebp})]\cdot 3.5\text{H}_2\text{O}$  (15 mg, 0.033 mmol) in  $\text{H}_2\text{O}$  (6 mL) was added a colourless solution containing  $\text{CdCl}_2\cdot 2.5\text{H}_2\text{O}$  (45 mg, 0.13 mmol) in  $\text{H}_2\text{O}$  (2 mL). The mixture was slowly evaporated at room temperature for 5 days. The resulting purple hexagonal plate crystals of  $\text{D}_3\text{L}_3\text{-2Cl}$  were collected by filtration and washed with a small amount of  $\text{H}_2\text{O}$ . One of the crystals was used for single-crystal X-ray analysis. Yield: 27 mg (71 %). Anal. Calcd for  $[\text{Cd}_6(\text{H}_2\text{O})_6\{\text{Co}(\text{ebp})\}_6\text{Cl}_6]\cdot 12\text{H}_2\text{O} = \text{C}_{72}\text{H}_{156}\text{Cd}_6\text{Cl}_6\text{Co}_6\text{N}_{12}\text{O}_{42}\text{S}_{12}$ : C, 25.05; H, 4.44; N, 4.87 %. Found: C, 25.07; H, 4.33; N, 4.91 %.

### **Physical measurements.**

The absorption and CD spectra in solution were recorded with a JASCO V-670 spectrophotometer and a JASCO V-670 spectrophotometer, respectively, at room temperature. The CD spectra in the solid state were recorded with a JASCO J-820 polarimeter using KBr disks at room temperature. The diffuse reflection spectra were recorded with a JASCO V-670

spectrophotometer equipped with a JASCO ISN-723 integrating sphere using MgSO<sub>4</sub> at room temperature. The CD spectra in the solid state were recorded with a JASCO J-820 polarimeter using KBr disks at room temperature. The elemental analyses (C, H, N) were performed with a Yanaco CHN Corder MT-5. The <sup>1</sup>H NMR spectra were recorded with a JEOL ECS500 spectrometer in D<sub>2</sub>O. Sodium 3-(trimethylsilyl)-1-propanesulfonate (DSS) was used as the internal standard. Fluorescence X-ray spectra were measured with a SHIMADZU Rayny EDX-720 energy-dispersive X-ray fluorescence spectrometer. The electrospray ionization (ESI) mass spectra were recorded on BRUKER micrOTOF II-OS (1.5 mM in water-methanol (v/v = 1/1)). The TG/DTA data were measured with a SHIMADZU DTG-60 using Al<sub>2</sub>O<sub>3</sub> as a reference.

### **Powder X-ray diffraction measurements.**

Powder X-ray diffraction patterns illustrated in Figures S13 and S14 were recorded at 200 K, in transmission mode [synchrotron radiation  $\lambda = 1.000 \text{ \AA}$ ;  $2\theta$  range =  $0-78^\circ$ ; step width =  $0.01^\circ$ ; data collection time = 1 min] on a diffractometer equipped with a white imaging plate detector at the SPring-8 BL02B2 beamline. The crystals were put into 0.3 mm glass capillary tubes, and the samples were rotated during the measurements. The diffraction patterns were collected with a large Debye–Scherrer camera. Powder X-ray diffraction patterns illustrated in Figures S17 and S18 were recorded at room temperature in reflection mode (Cu radiation  $\lambda = 1.54 \text{ \AA}$ ,  $2\theta$  range =  $6-30^\circ$ ; step width =  $0.05^\circ$ ). The powder simulation patterns were generated from the single-crystal X-ray structures using Mercury 3.10.<sup>S5</sup>

### **X-ray Structural Determinations.**

The single-crystal X-ray diffraction measurements were performed using a Rigaku FR-E Superbright rotating-anode X-ray source with a Mo-target ( $\lambda = 0.71075 \text{ \AA}$ ), equipped with a Rigaku RAXIS VII imaging plate as a detector, at 200 K. The intensity data were collected via the  $\omega$ -scan technique and empirically corrected for absorption. The structures of the complexes were solved by direct methods using SHELXS97.<sup>S6</sup> The structure refinements were carried out using the full matrix least-squares method (SHELXL-2014).<sup>S6</sup> The crystallographic data are summarized in Tables S1-S4. All calculations were performed using the Yadokari-XG software package.<sup>S7</sup> Crystallographic data have been deposited with Cambridge Crystallographic Data Centre (CCDC 1879438-1879446). Copies of the data can be obtained free of charge via <http://www.ccdc.cam.ac.uk/conts/retrieving.html> (or from the Cambridge Crystallographic Data Centre, 12, Union Road, Cambridge, CB2 1EZ, U.K.; Fax: +44 1223 336033; e-mail: [deposit@ccdc.cam.ac.uk](mailto:deposit@ccdc.cam.ac.uk)).

For D<sub>3</sub>-**1I**, L<sub>3</sub>-**1I**, [CdCl{Co(D-ebp)}]<sub>n</sub>, L<sub>3</sub>-**1Br**, all non-hydrogen atoms except for several water molecules were refined anisotropically, while the other atoms were refined isotropically. H atoms were included in the calculated positions except those of water molecules. For D<sub>3</sub>-**1Br**, D<sub>3</sub>L<sub>3</sub>-**2Br**, and D<sub>3</sub>L<sub>3</sub>-**2Cl**, all non-hydrogen atoms were refined anisotropically, while the other atoms were refined isotropically. H atoms were included in the calculated positions except those of water molecules. For D<sub>3</sub>L<sub>3</sub>-**2I**, all non-hydrogen atoms were refined anisotropically, while the other atoms were refined isotropically. H atoms bound to C and N atoms were placed at the calculated positions and refined using a riding model. The H atoms of water molecules were found in the Fourier map and refined with restrained displacement parameters [ $U_{\text{iso}}(\text{H}) =$

1.2 $U_{eq}(O)$ ]. For D<sub>2</sub>L<sub>2</sub>-**3**, the complex molecule was disordered over two positions (part A (occ. 90 %) and part B (occ. 10 %)). All non-hydrogen atoms belonging to the major part (part A) were refined anisotropically, while the atoms belonging to the minor part (part B) were refined isotropically. The H atoms, which were refined isotropically, were included in the calculated positions except those of water molecules. The DFIX and EADP restraints were used to model the minor part. Because the geometrical parameters of the atoms belonging to the minor part were inaccurate, their data were excluded from the discussion.

## References.

- (S1) Howard-Lock, H. E.; Lock, C. J. L.; Martins, M. L.; Smalley, P. S.; Bell, R. A. Amino-acid zwitterion equilibria: vibrational and nuclear magnetic resonance studies of methyl-substituted thiazolidine-4-carboxylic acids. *Can. J. Chem.* **1986**, *64*, 1215-1219.
- (S2) Blondeau, P.; Berse, C.; Gravel, D. Dimerization of an intermediate during the sodium in liquid ammonia reduction of l-thiazolidine-4-carboxylic acid. *Can. J. Chem.* **1967**, *45*, 49-52.
- (S3) Bauer, H. F.; Drinkard, W. C. A General Synthesis of Cobalt(III) Complexes; A New Intermediate, Na<sub>3</sub>[Co(CO<sub>3</sub>)<sub>3</sub>]·3H<sub>2</sub>O. *J. Am. Chem. Soc.* **1960**, *82*, 5031-5032.
- (S4) Okamoto, K.; Fushimi, N.; Konno, T.; Hidaka, J. Preparation and Characterization of *N,N*-bridged and/or *S,S*-bridged Sexidentate-N<sub>2</sub>O<sub>2</sub>S<sub>2</sub> Cobalt(III) Complexes. Crystal Structure of {(3S, 8S)-2,2,9,9-Tetramethyl-1,10-dithia-4,7-diazacyclotetradecane-3,8-dicarboxylato}cobalt(III) bromide, *Bull. Chem. Soc. Jpn.* **1991**, *64*, 2635-2643.
- (S5) Macrae, C. F.; Bruno, I. J.; Chisholm, J. A.; Edgington, P. R.; McCabe, P.; Pidcock, E.; Rodriguez-Monge, L.; Taylor, R.; van de Streek J.; Wood, P. A. Mercury CSD 2.0 - new features for the visualisation and investigation of crystal structures, *J. Appl. Cryst.* **2008**, *41*, 466-470.
- (S6) Sheldrick, G. M. A short history of SHELX, *Acta Cryst.* **2008**, *A64*, 112-122.
- (S7) Kabuto, C.; Akine, S.; E. Nemoto,; Kwon, E. Release of Software (Yadokari-XG 2009) for Crystal Structure Analyses, *Nihon Kessho Gakkaishi* **2009**, *51*, 218-224.

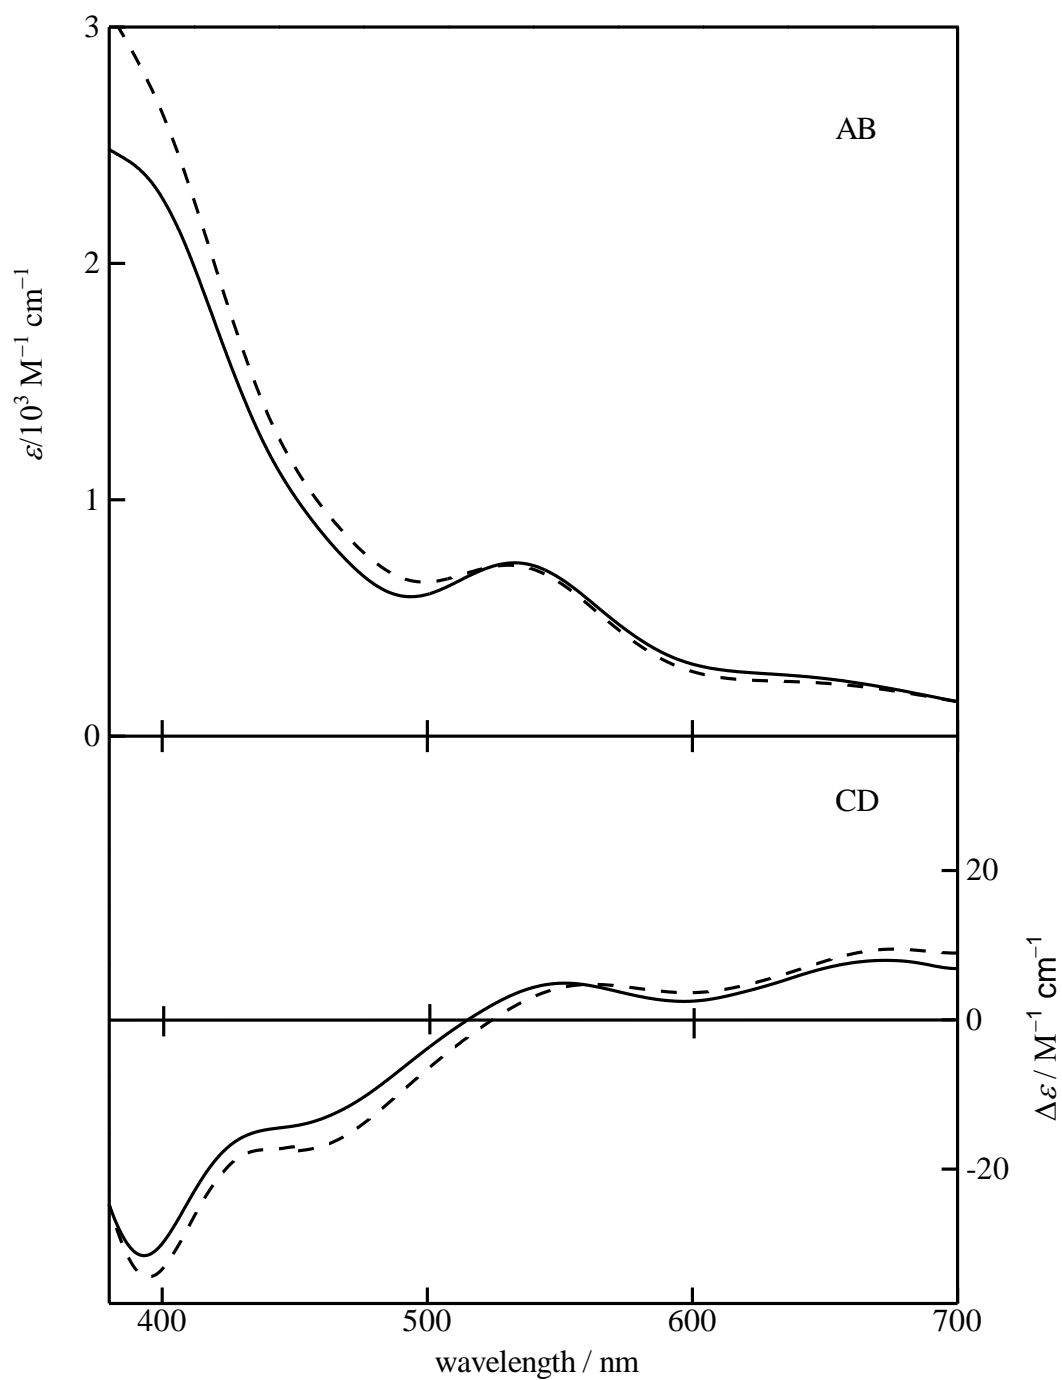

**Figure S1.** Absorption (AB) and CD spectra of Na[Co(D-ebp)] $\times$ 3 (dashed line) and D<sub>3</sub>-1I (solid line) in water.

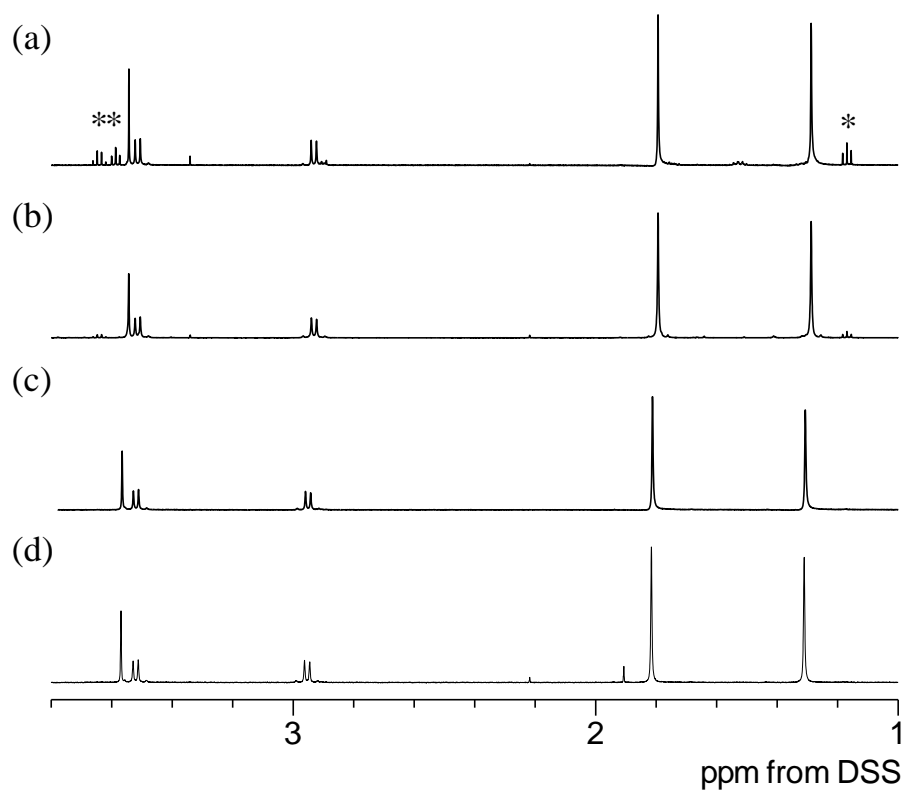

**Figure S2.**  $^1\text{H}$  NMR spectra of (a)  $\text{Na}[\text{Co}(\text{D-ebp})]$ , (b)  $\text{Na}[\text{Co}(\text{L-ebp})]$ , (c)  $\text{D}_3\text{-1I}$ , and (d)  $\text{L}_3\text{-1I}$  in  $\text{D}_2\text{O}$ . (\* denotes the signals from solvents)



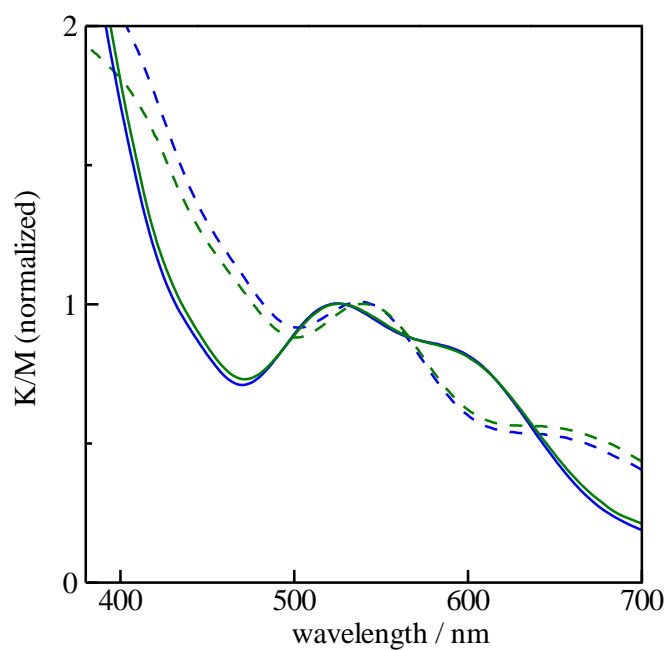

**Figure S3.** Diffuse reflection spectra of Na[Co(D-ebp)] (blue dashed line), Na[Co(L-ebp)] (green dashed line), D<sub>3</sub>-**1I** (blue solid line), and L<sub>3</sub>-**1I** (green solid line) in the solid state. The reflection intensity was normalized at the absorption band approximately 500-550 nm.

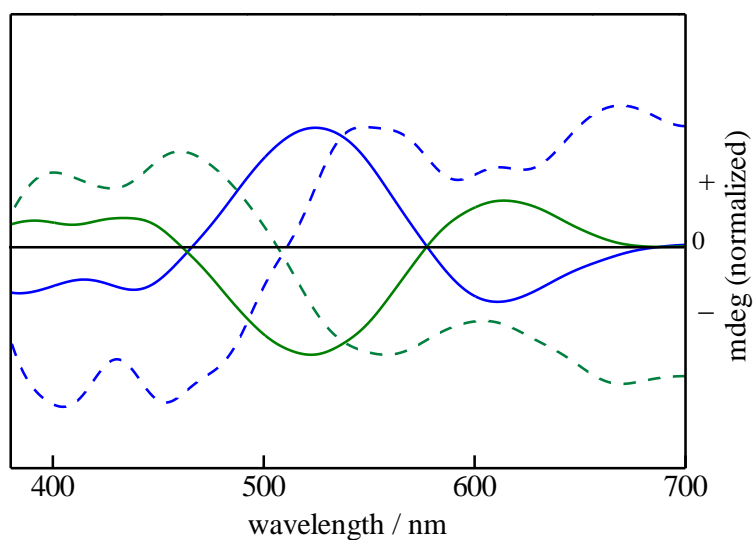

**Figure S4.** CD spectra of Na[Co(D-ebp)] (blue dashed line), Na[Co(L-ebp)] (green dotted line), D<sub>3</sub>-**1I** (blue dashed line), and L<sub>3</sub>-**1I** (green solid line) in the solid state. The CD intensity was normalized at the band approximately 500-550 nm.

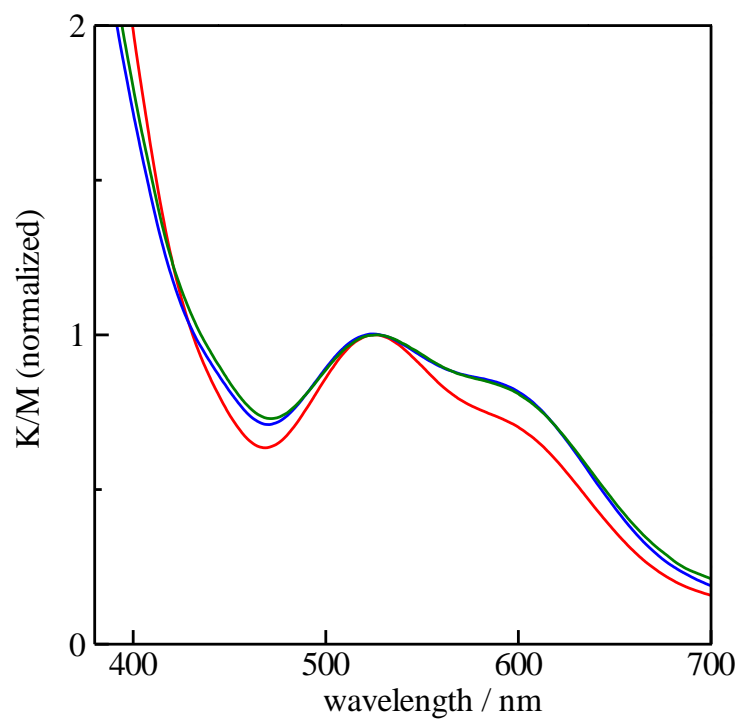

**Figure S5.** Diffuse reflection spectra of D<sub>3</sub>-1I (blue), L<sub>3</sub>-1I (green), and D<sub>3</sub>L<sub>3</sub>-2I (red). The reflection intensity was normalized at the absorption band approximately 500-550 nm.

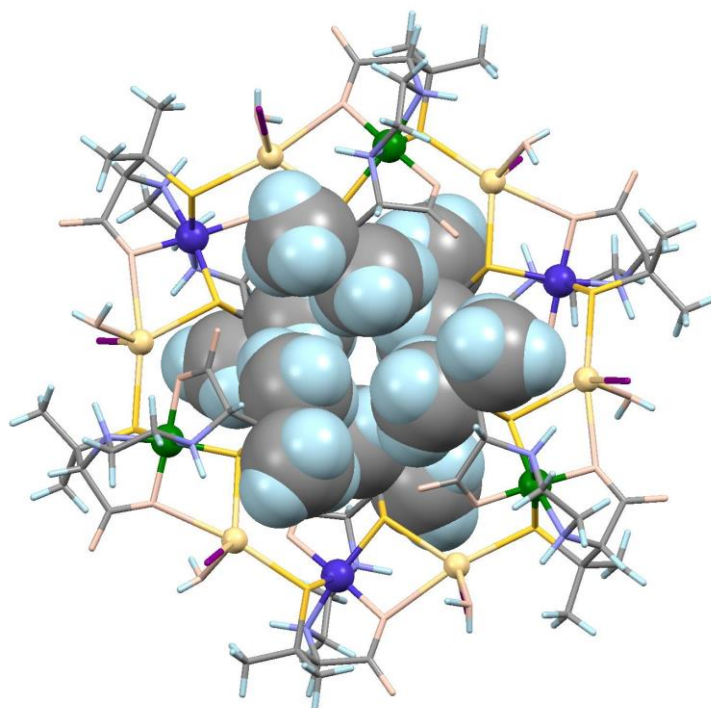

**Figure S6.** A perspective view of  $D_3L_3-2I$ . The methyl groups occupying the central cavity were illustrated as a space-filling model. Colour code: Cd, beige; I, purple; Co, blue for  $[Co(D-ebp)]^-$  unit and green for  $[Co(L-ebp)]^-$  unit; S, yellow; O, pink; N, pale blue; C, grey. H, sky blue.

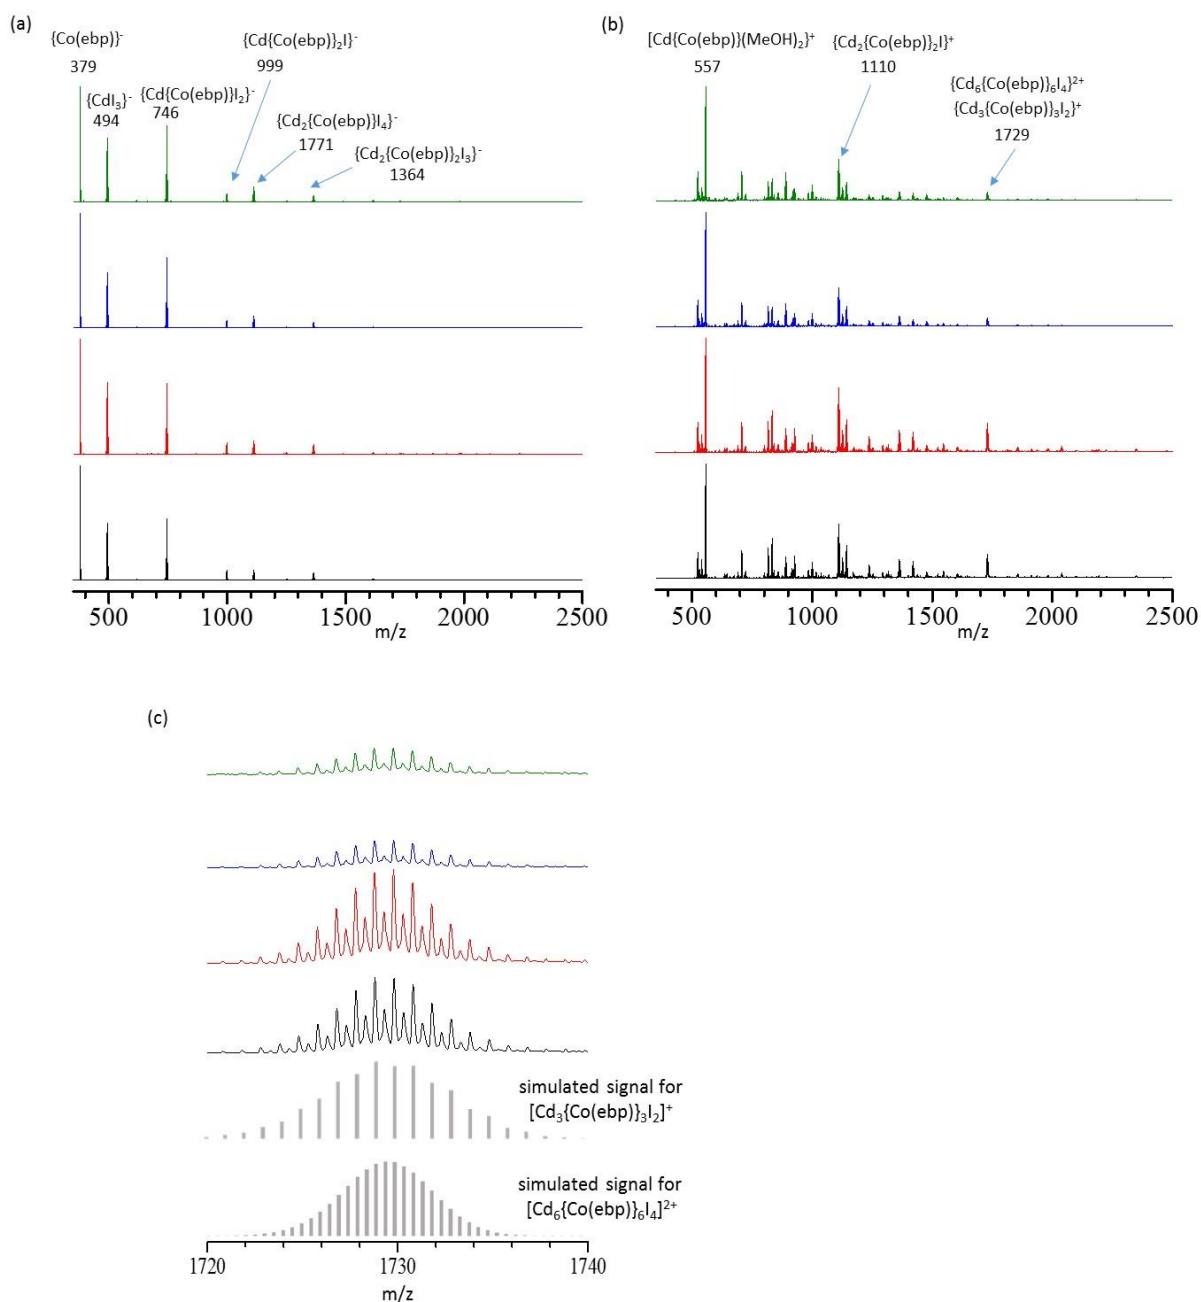

**Figure S7.** ESI-mass spectra of D<sub>3</sub>-**1I** (green), L<sub>3</sub>-**1I** (blue), D<sub>3</sub>L<sub>3</sub>-**2I** (red), and a mixture of D<sub>3</sub>-**1I** and L<sub>3</sub>-**1I** (black) in H<sub>2</sub>O/MeOH. (a) The entire spectra measured in negative mode and (b) positive mode. (c) The isotope pattern of the signal at  $m/z = 1729$  observed in the positive mode with the simulated patterns.

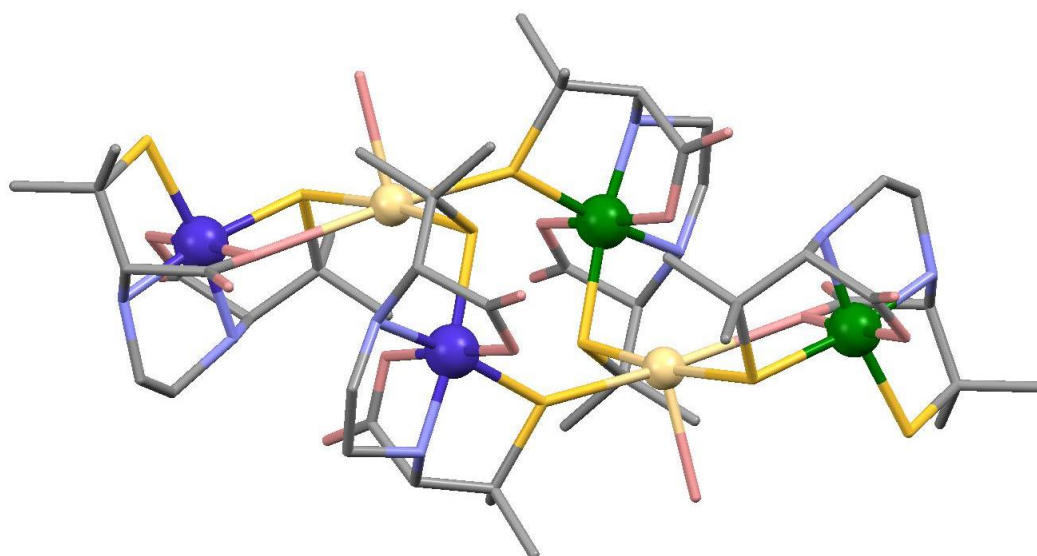

**Figure S8.** A perspective view of  $D_2L_2-3$ . Colour code: Cd, beige; Co, blue for  $[Co(D-ebp)]^-$  unit and green for  $[Co(L-ebp)]^-$  unit; S, yellow; O, pink; N, pale blue; C, grey. H atoms are omitted for clarity.

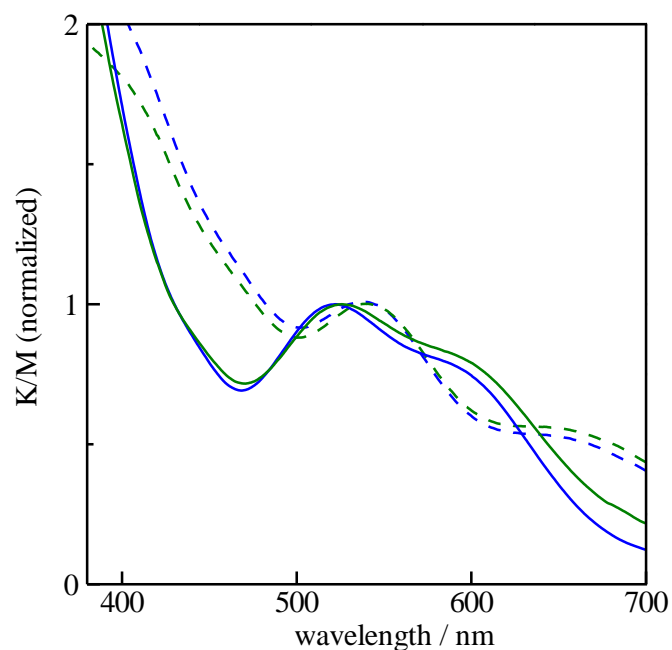

**Figure S9.** Diffuse reflection spectra of Na[Co(D-ebp)] (blue dashed line), Na[Co(L-ebp)] (green dashed line), D<sub>3</sub>-**1Br** (blue solid line), and L<sub>3</sub>-**1Br** (green solid line) in the solid state. The reflection intensity was normalized at the absorption band approximately 500-550 nm.

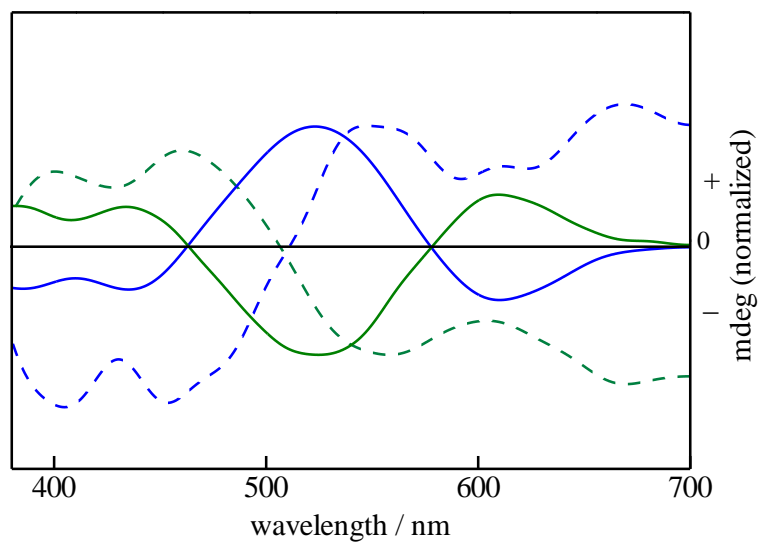

**Figure S10.** CD spectra of Na[Co(D-ebp)] (blue dashed line), Na[Co(L-ebp)] (green dashed line), D<sub>3</sub>-**1Br** (blue solid line), and L<sub>3</sub>-**1Br** (green solid line) in the solid state. The CD intensity was normalized at the absorption band approximately 500-550 nm.

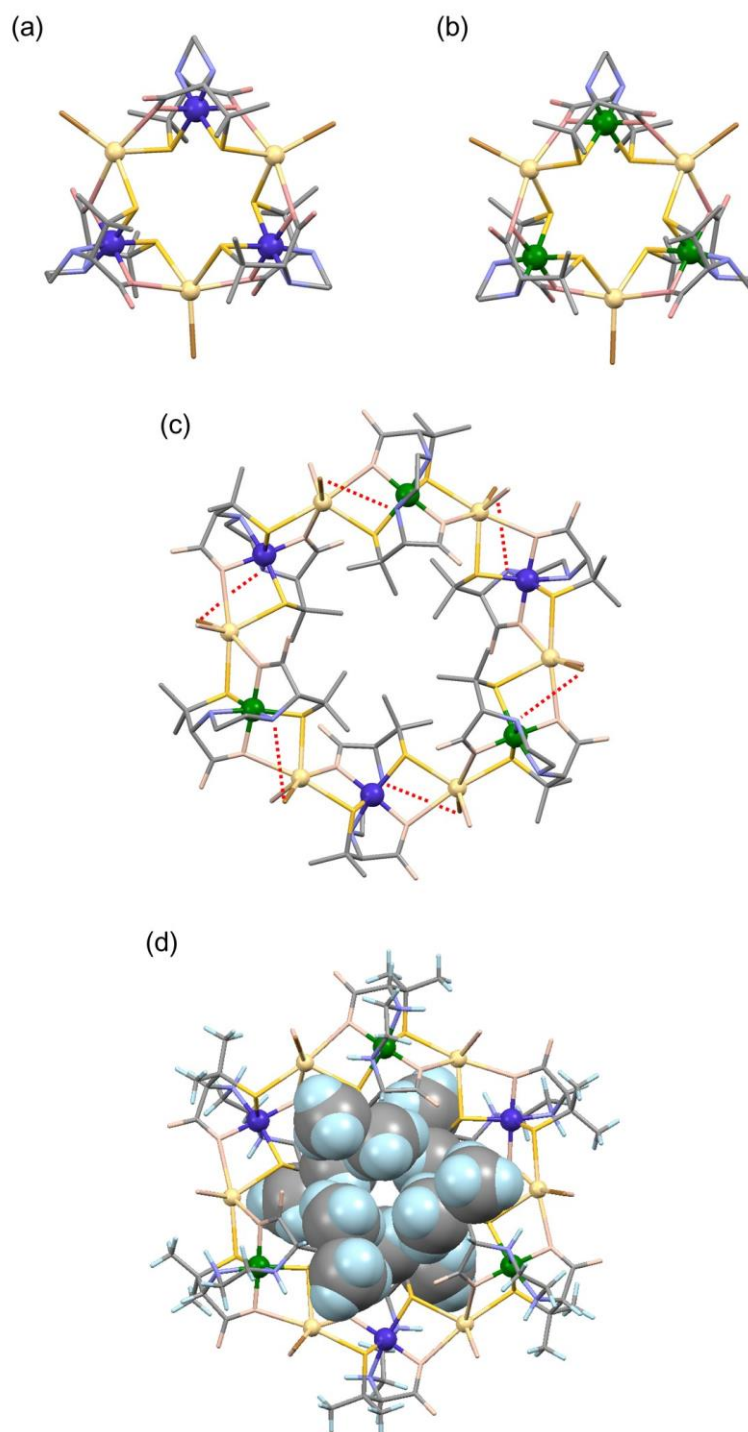

**Figure S11.** Perspective views of (a)  $D_3-1Br$ , (b)  $L_3-1Br$ , and (c,d)  $D_3L_3-2Br$ . The methyl groups occupying the central cavity were illustrated as a space-filling model for (d). Colour code: Cd, beige; Br, brown; Co, blue for  $[Co(D-ebp)]^-$  unit and green for  $[Co(L-ebp)]^-$  unit; S, yellow; O, pink; N, pale blue; C, grey. H atoms are omitted for clarity for (a)-(c). Red dashed lines indicate  $NH \cdots I$  hydrogen bonds.

(a)

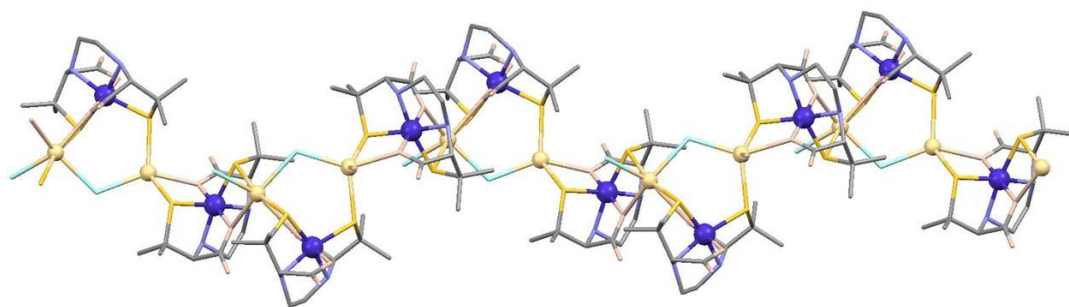

(b)

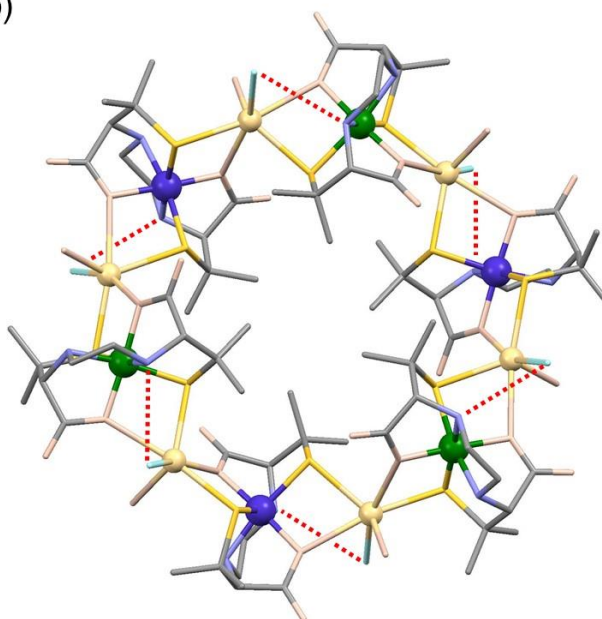

**Figure S12.** Perspective views of (a)  $[\text{CdCl}\{\text{Co}(\text{D-ebp})\}]_n$  and (b)  $\text{D}_3\text{L}_3\text{-2Cl}$ . Colour code: Cd, beige; Cl, sky blue; Co, blue for  $[\text{Co}(\text{D-ebp})]^-$  unit and green for  $[\text{Co}(\text{L-ebp})]^-$  unit; S, yellow; O, pink; N, pale blue; C, grey. Red dashed lines indicate  $\text{NH}\cdots\text{I}$  hydrogen bonds.



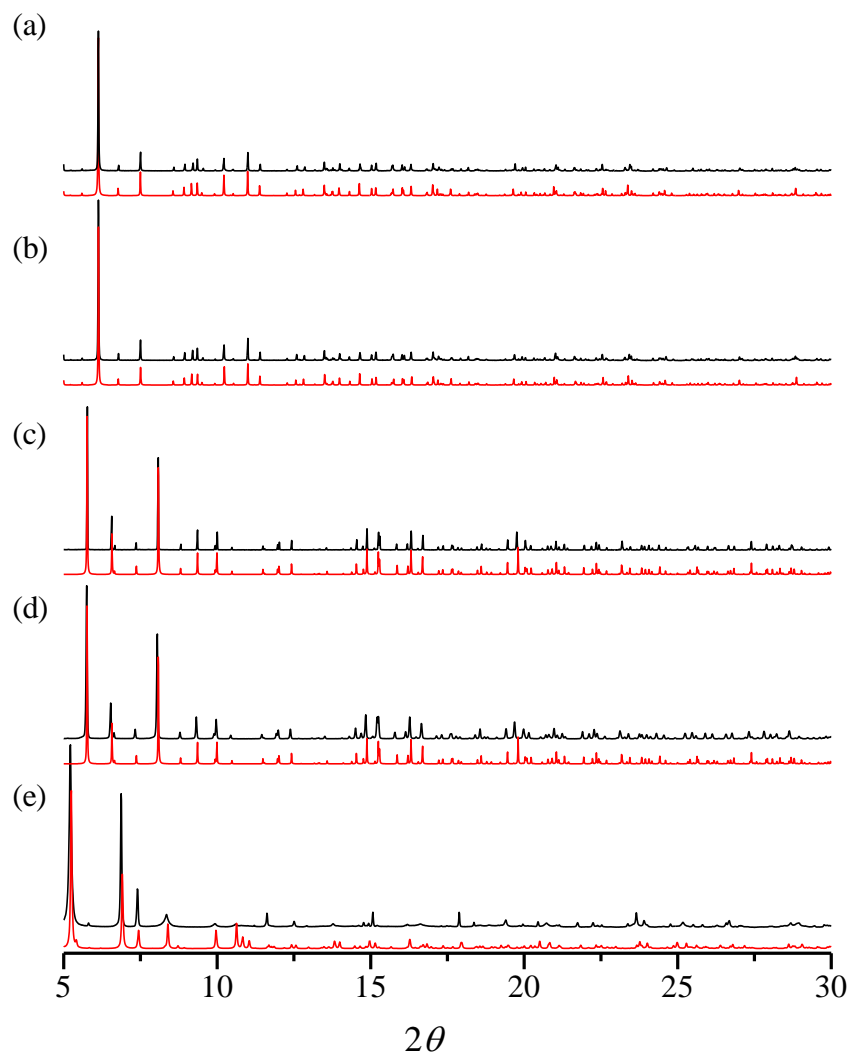

**Figure S13.** Observed (black) and calculated (red) PXRD patterns of (a)  $D_3\text{-1I}$ , (b)  $L_3\text{-1I}$ , (c)  $D_3L_3\text{-2I}$  prepared from the reaction of  $\text{Na}[\text{Co}(\text{D-ebp})]$ ,  $\text{Na}[\text{Co}(\text{L-ebp})]$ , and  $\text{CdI}_2$ , (d)  $D_3L_3\text{-2I}$  prepared from the reaction of  $D_3\text{-1I}$ ,  $L_3\text{-1I}$ , and  $\text{NaI}$ , and (e)  $D_2L_2\text{-3}$  [ $\lambda = 1.000 \text{ \AA}$ , 200 K].

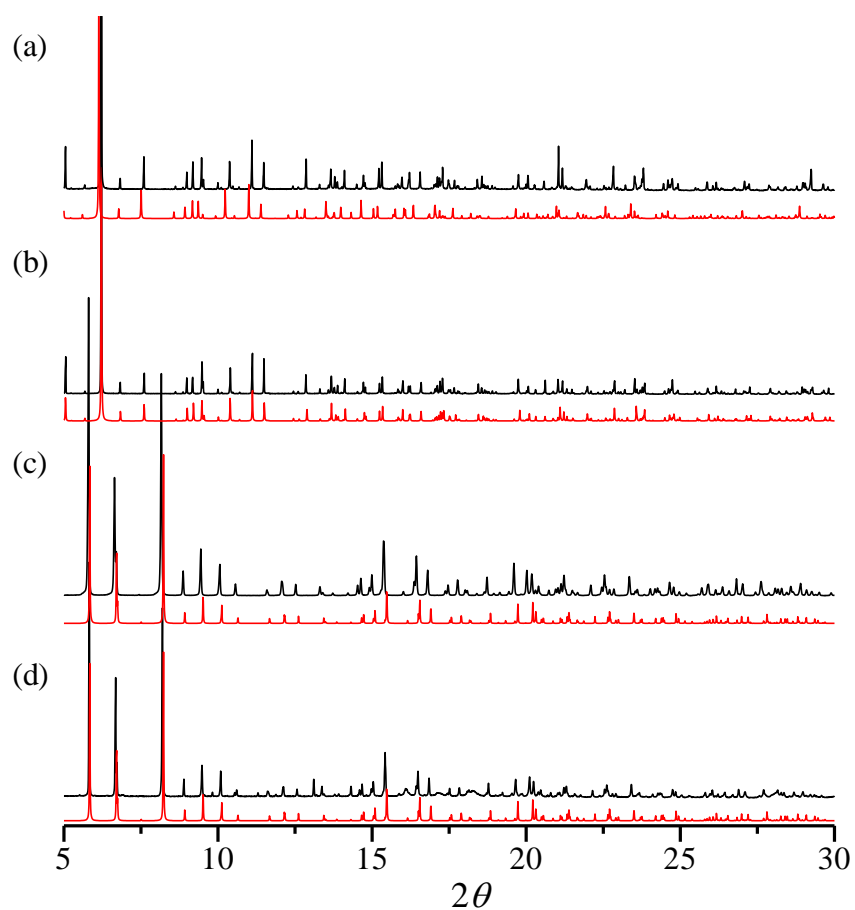

**Figure S14.** Observed (black) and calculated (red) PXRD patterns of (a)  $D_3\text{-1Br}$ , (b)  $L_3\text{-1Br}$ , (c)  $D_3L_3\text{-2Br}$  prepared from the reaction of  $\text{Na}[\text{Co}(\text{D-ebp})]$ ,  $\text{Na}[\text{Co}(\text{L-ebp})]$ , and  $\text{CdBr}_2$ , and (d)  $D_3L_3\text{-2Br}$  prepared from the reaction of  $D_3\text{-1Br}$ ,  $L_3\text{-1Br}$ , and  $\text{NaBr}$ . [ $\lambda = 1.000 \text{ \AA}$ ].

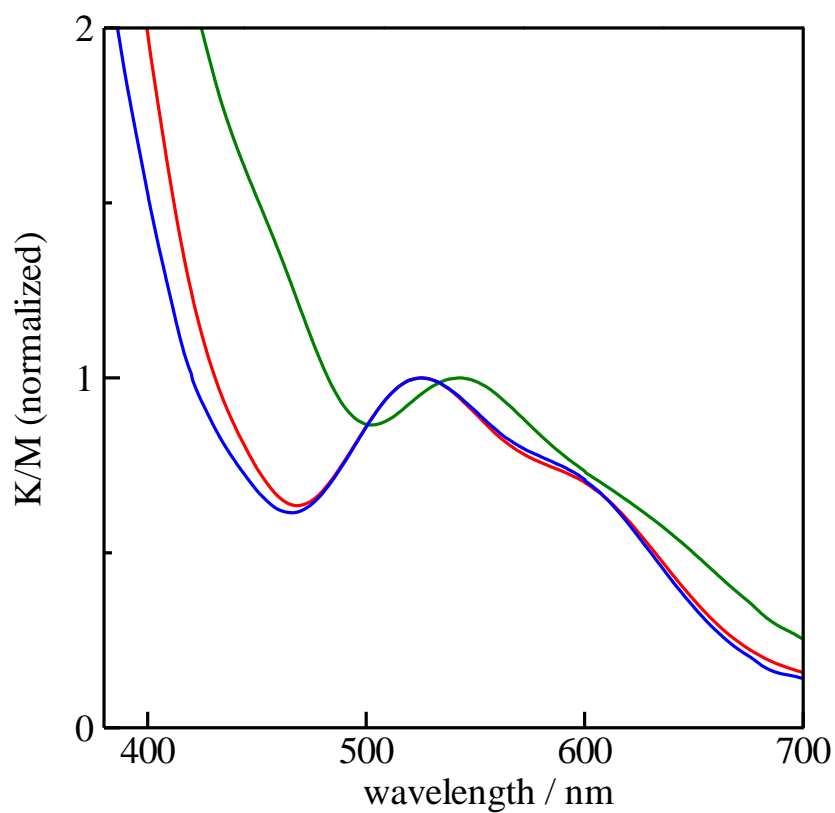

**Figure S15.** Diffuse reflection spectra of D<sub>3</sub>L<sub>3</sub>-2I (red), D<sub>2</sub>L<sub>3</sub>-3 (green), and D<sub>3</sub>L<sub>3</sub>-2Br (blue). The reflection intensity was normalized at the absorption band approximately 500-550 nm.

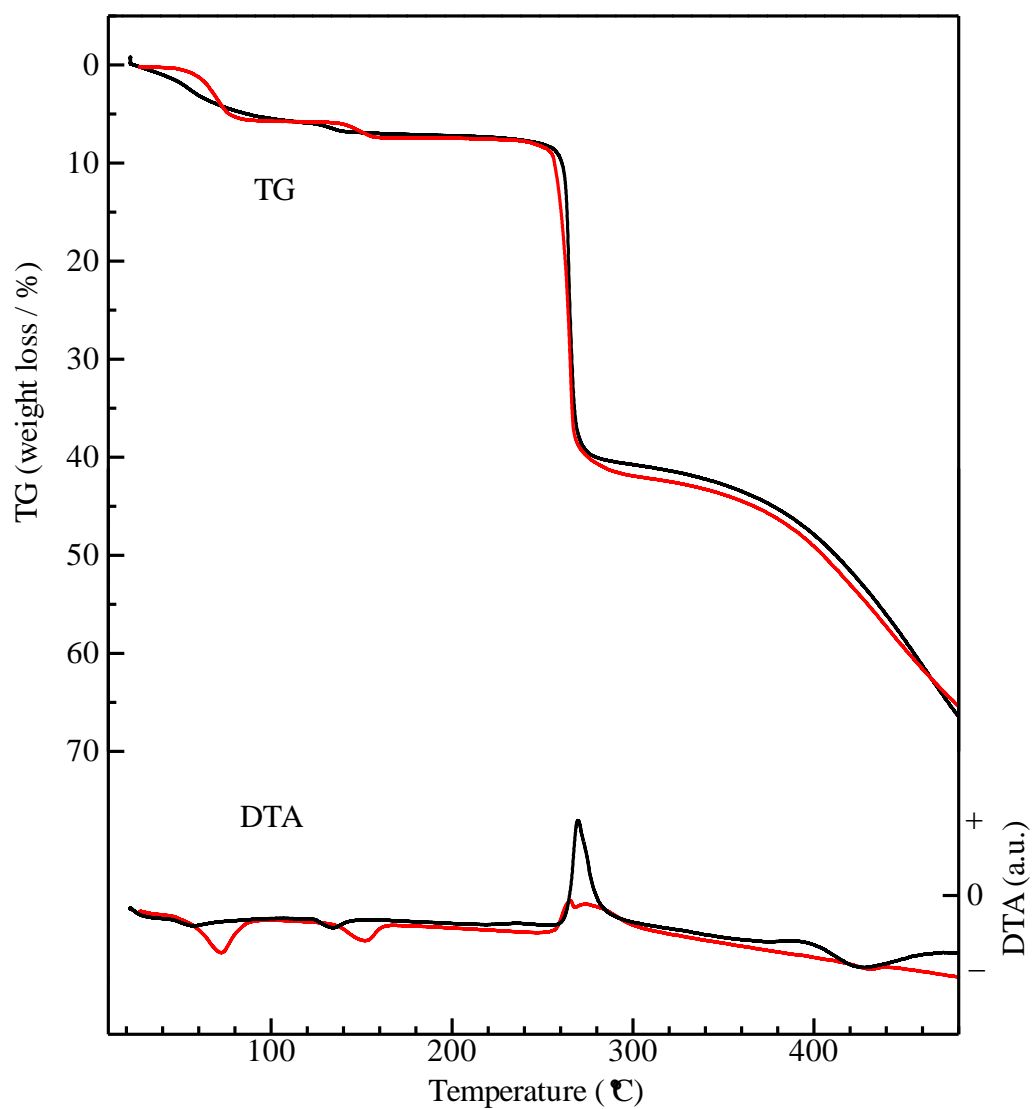

**Figure S16.** TG/DTA data for  $D_3-1I$  (black) and  $D_3L_3-2I$  (red).

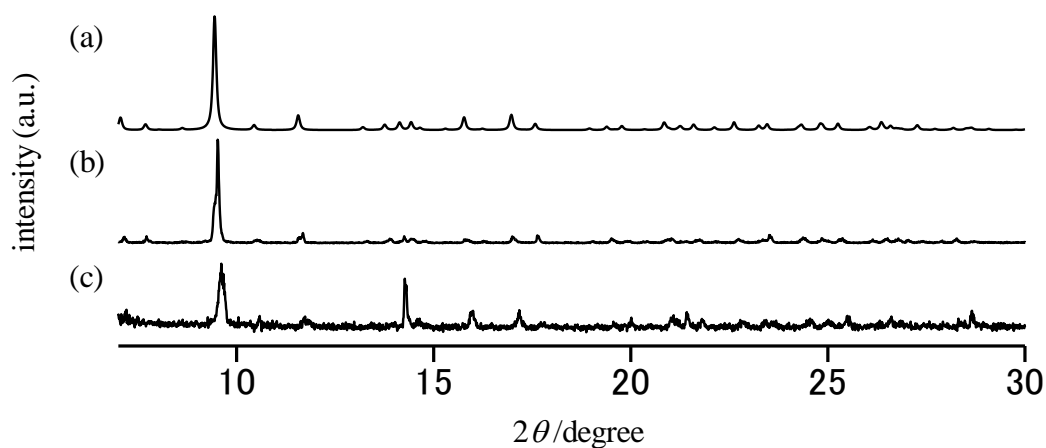

**Figure S17.** (a) Simulated and (b) observed PXRD patterns of  $D_3$ -**1I** kept at room temperature for more than 1 year and (c) heated at 100 °C for 1 hour [ $\lambda = 1.540 \text{ \AA}$ , room temperature].

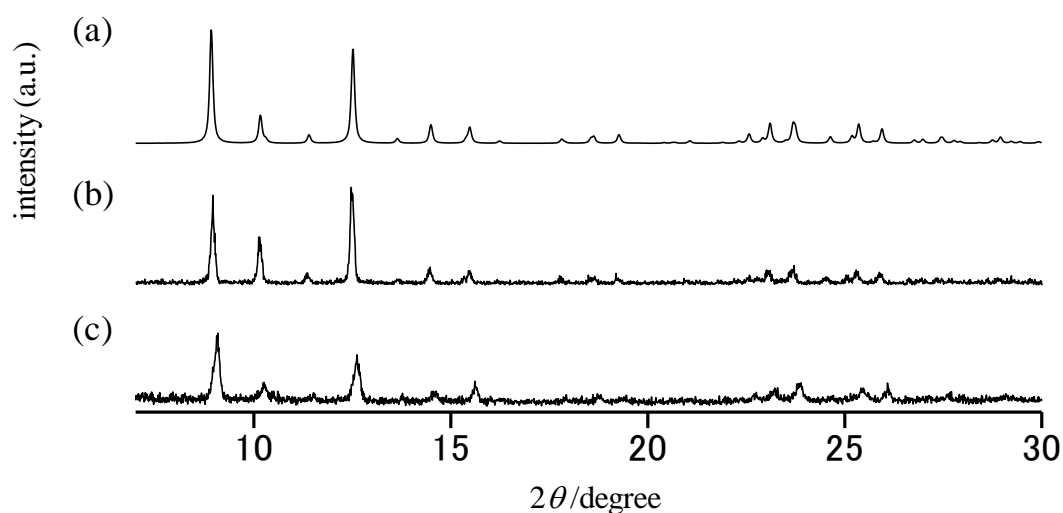

**Figure S18.** (a) Simulated and (b) observed PXRD patterns of  $D_3L_3$ -**2I** kept at room temperature for more than 1 year and (c) heated at 100 °C for 1 hour [ $\lambda = 1.540 \text{ \AA}$ , room temperature].

**Table S1.** Crystallographic data for D<sub>3</sub>-**1I**, L<sub>3</sub>-**1I**, and D<sub>3</sub>L<sub>3</sub>-**2I**.

|                                                                 | [Cd <sub>3</sub> {Co(D-ebp)} <sub>3</sub> I <sub>3</sub> ]·9H <sub>2</sub> O<br>(D <sub>3</sub> - <b>1I</b> )                | [Cd <sub>3</sub> {Co(L-ebp)} <sub>3</sub> I <sub>3</sub> ]·9H <sub>2</sub> O<br>(L <sub>3</sub> - <b>1I</b> )                | [Cd <sub>6</sub> (H <sub>2</sub> O) <sub>6</sub> {Co(D-ebp)} <sub>3</sub> {Co(L-ebp)} <sub>3</sub> I <sub>6</sub> ]·12H <sub>2</sub> O<br>(D <sub>3</sub> L <sub>3</sub> - <b>2I</b> ) |
|-----------------------------------------------------------------|------------------------------------------------------------------------------------------------------------------------------|------------------------------------------------------------------------------------------------------------------------------|----------------------------------------------------------------------------------------------------------------------------------------------------------------------------------------|
| Formula                                                         | C <sub>36</sub> H <sub>60</sub> Cd <sub>3</sub> Co <sub>3</sub> I <sub>3</sub> N <sub>6</sub> O <sub>21</sub> S <sub>6</sub> | C <sub>36</sub> H <sub>60</sub> Cd <sub>3</sub> Co <sub>3</sub> I <sub>3</sub> N <sub>6</sub> O <sub>21</sub> S <sub>6</sub> | C <sub>72</sub> H <sub>156</sub> Cd <sub>6</sub> Co <sub>6</sub> I <sub>6</sub> N <sub>12</sub> O <sub>42</sub> S <sub>12</sub>                                                        |
| Colour, form                                                    | purple, block                                                                                                                | purple, block                                                                                                                | purple, hexagonal plate                                                                                                                                                                |
| <i>M</i>                                                        | 1999.95                                                                                                                      | 1999.95                                                                                                                      | 4036.18                                                                                                                                                                                |
| Crystal system                                                  | orthorhombic                                                                                                                 | orthorhombic                                                                                                                 | trigonal                                                                                                                                                                               |
| Space group                                                     | <i>C</i> 222 <sub>1</sub>                                                                                                    | <i>C</i> 222 <sub>1</sub>                                                                                                    | <i>R</i> -3                                                                                                                                                                            |
| <i>a</i> /Å                                                     | 11.2294(7)                                                                                                                   | 11.2149(7)                                                                                                                   | 34.458(5)                                                                                                                                                                              |
| <i>b</i> /Å                                                     | 25.0427(15)                                                                                                                  | 25.0212(15)                                                                                                                  | 34.458(5)                                                                                                                                                                              |
| <i>c</i> /Å                                                     | 22.9742(16)                                                                                                                  | 22.9649(16)                                                                                                                  | 9.1227(6)                                                                                                                                                                              |
| <i>α</i> /°                                                     | 90                                                                                                                           | 90                                                                                                                           | 90                                                                                                                                                                                     |
| <i>β</i> /°                                                     | 90                                                                                                                           | 90                                                                                                                           | 90                                                                                                                                                                                     |
| <i>γ</i> /°                                                     | 90                                                                                                                           | 90                                                                                                                           | 120                                                                                                                                                                                    |
| <i>V</i> /Å <sup>3</sup>                                        | 6460.7(7)                                                                                                                    | 6444.2(7)                                                                                                                    | 9381(3)                                                                                                                                                                                |
| <i>Z</i>                                                        | 4                                                                                                                            | 4                                                                                                                            | 3                                                                                                                                                                                      |
| <i>T</i> /K                                                     | 200(2)                                                                                                                       | 200(2)                                                                                                                       | 200(2)                                                                                                                                                                                 |
| <i>F</i> (000)                                                  | 3864                                                                                                                         | 3864                                                                                                                         | 5904                                                                                                                                                                                   |
| <i>ρ</i> <sub>calcd</sub> /g cm <sup>-3</sup>                   | 2.056                                                                                                                        | 2.061                                                                                                                        | 2.143                                                                                                                                                                                  |
| <i>μ</i> (Mo Kα) /mm <sup>-1</sup>                              | 3.418                                                                                                                        | 3.427                                                                                                                        | 3.532                                                                                                                                                                                  |
| Crystal size /mm <sup>3</sup>                                   | 0.10×0.07×0.02                                                                                                               | 0.10×0.05×0.03                                                                                                               | 0.10×0.10×0.03                                                                                                                                                                         |
| Limiting indices                                                | −14 ≤ <i>h</i> ≤ 14,<br>−31 ≤ <i>k</i> ≤ 32,<br>−29 ≤ <i>l</i> ≤ 29                                                          | −14 ≤ <i>h</i> ≤ 12,<br>−32 ≤ <i>k</i> ≤ 32,<br>−29 ≤ <i>l</i> ≤ 29                                                          | −44 ≤ <i>h</i> ≤ 44,<br>−44 ≤ <i>k</i> ≤ 44,<br>−11 ≤ <i>l</i> ≤ 11                                                                                                                    |
| <i>R</i> <sub>1</sub> <sup>a</sup> ( <i>I</i> > 2σ( <i>I</i> )) | 0.036                                                                                                                        | 0.031                                                                                                                        | 0.021                                                                                                                                                                                  |
| <i>wR</i> <sub>2</sub> <sup>b</sup> (all data)                  | 0.081                                                                                                                        | 0.075                                                                                                                        | 0.049                                                                                                                                                                                  |
| GOF                                                             | 1.060                                                                                                                        | 1.069                                                                                                                        | 1.140                                                                                                                                                                                  |
| Flack parameter                                                 | 0.030(6)                                                                                                                     | 0.011(5)                                                                                                                     | —                                                                                                                                                                                      |
| CCDC No.                                                        | 1879438                                                                                                                      | 1879439                                                                                                                      | 1879440                                                                                                                                                                                |

$$^a R_1 = (\sum(|F_o| - |F_c|)) / (\sum |F_o|)$$

$$^b wR_2 = [\{\sum w(F_o^2 - F_c^2)^2\} / (\sum w|F_o^2|^2)]^{1/2}$$

**Table S2.** Crystallographic data for D<sub>2</sub>L<sub>2</sub>-**3**.

| [Cd <sub>2</sub> (H <sub>2</sub> O) <sub>2</sub> {Co(D-ebp)} <sub>2</sub> {Co(L-ebp)} <sub>2</sub> ].8H <sub>2</sub> O<br>(D <sub>2</sub> L <sub>2</sub> - <b>3</b> ) |                                                                                                               |
|-----------------------------------------------------------------------------------------------------------------------------------------------------------------------|---------------------------------------------------------------------------------------------------------------|
| Formula                                                                                                                                                               | C <sub>48</sub> H <sub>80</sub> Cd <sub>2</sub> Co <sub>4</sub> N <sub>8</sub> O <sub>26</sub> S <sub>8</sub> |
| Colour, form                                                                                                                                                          | green, block                                                                                                  |
| <i>M</i>                                                                                                                                                              | 1902.20                                                                                                       |
| Crystal system                                                                                                                                                        | monoclinic                                                                                                    |
| Space group                                                                                                                                                           | <i>P</i> 2 <sub>1</sub> / <i>n</i>                                                                            |
| <i>a</i> /Å                                                                                                                                                           | 14.7082(11)                                                                                                   |
| <i>b</i> /Å                                                                                                                                                           | 15.4846(12)                                                                                                   |
| <i>c</i> /Å                                                                                                                                                           | 15.6106(12)                                                                                                   |
| <i>α</i> /°                                                                                                                                                           | 90                                                                                                            |
| <i>β</i> /°                                                                                                                                                           | 99.087(7)                                                                                                     |
| <i>γ</i> /°                                                                                                                                                           | 90                                                                                                            |
| <i>V</i> /Å <sup>3</sup>                                                                                                                                              | 3510.7(5)                                                                                                     |
| <i>Z</i>                                                                                                                                                              | 2                                                                                                             |
| <i>T</i> /K                                                                                                                                                           | 200(2)                                                                                                        |
| <i>F</i> (000)                                                                                                                                                        | 1928                                                                                                          |
| <i>ρ</i> <sub>calcd</sub> /g cm <sup>-3</sup>                                                                                                                         | 1.799                                                                                                         |
| <i>μ</i> (Mo Kα) /mm <sup>-1</sup>                                                                                                                                    | 1.838                                                                                                         |
| Crystal size /mm <sup>3</sup>                                                                                                                                         | 0.15×0.05×0.03                                                                                                |
| Limiting indices                                                                                                                                                      | −19 ≤ <i>h</i> ≤ 19,<br>−20 ≤ <i>k</i> ≤ 20,<br>−20 ≤ <i>l</i> ≤ 19                                           |
| <i>R</i> <sub>1</sub> <sup>a</sup> ( <i>I</i> > 2σ( <i>I</i> ))                                                                                                       | 0.059                                                                                                         |
| <i>wR</i> <sub>2</sub> <sup>b</sup> (all data)                                                                                                                        | 0.150                                                                                                         |
| GOF                                                                                                                                                                   | 1.127                                                                                                         |
| CCDC No.                                                                                                                                                              | 1879441                                                                                                       |

$$^a R_1 = (\sum(|F_o| - |F_c|)) / (\sum |F_o|)$$

$$^b wR_2 = [\{\sum w(F_o^2 - F_c^2)^2\} / (\sum w|F_o^2|)]^{1/2}$$

**Table S3.** Crystallographic data for D<sub>3</sub>-**1Br**, L<sub>3</sub>-**1Br**, and D<sub>3</sub>L<sub>3</sub>-**2Br**.

|                                                                 | [Cd <sub>3</sub> {Co(D-ebp)} <sub>3</sub> Br <sub>3</sub> ]·9H <sub>2</sub> O<br>(D <sub>3</sub> - <b>1Br</b> )               | [Cd <sub>3</sub> {Co(L-ebp)} <sub>3</sub> Br <sub>3</sub> ]·9H <sub>2</sub> O<br>(L <sub>3</sub> - <b>1Br</b> )               | [Cd <sub>6</sub> (H <sub>2</sub> O) <sub>6</sub> {Co(D-ebp)} <sub>3</sub> {Co(L-ebp)} <sub>3</sub> Br <sub>6</sub> ]·12H <sub>2</sub> O<br>(D <sub>3</sub> L <sub>3</sub> - <b>2Br</b> ) |
|-----------------------------------------------------------------|-------------------------------------------------------------------------------------------------------------------------------|-------------------------------------------------------------------------------------------------------------------------------|------------------------------------------------------------------------------------------------------------------------------------------------------------------------------------------|
| Formula                                                         | C <sub>36</sub> H <sub>60</sub> Br <sub>3</sub> Cd <sub>3</sub> Co <sub>3</sub> N <sub>6</sub> O <sub>21</sub> S <sub>6</sub> | C <sub>36</sub> H <sub>60</sub> Br <sub>3</sub> Cd <sub>3</sub> Co <sub>3</sub> N <sub>6</sub> O <sub>21</sub> S <sub>6</sub> | C <sub>72</sub> H <sub>156</sub> Br <sub>6</sub> Cd <sub>6</sub> Co <sub>6</sub> N <sub>12</sub> O <sub>42</sub> S <sub>12</sub>                                                         |
| Colour, form                                                    | purple, block                                                                                                                 | purple, block                                                                                                                 | purple, hexagonal plate                                                                                                                                                                  |
| <i>M</i>                                                        | 1858.98                                                                                                                       | 1858.98                                                                                                                       | 3717.95                                                                                                                                                                                  |
| Crystal system                                                  | orthorhombic                                                                                                                  | orthorhombic                                                                                                                  | Trigonal                                                                                                                                                                                 |
| Space group                                                     | <i>C</i> 222 <sub>1</sub>                                                                                                     | <i>C</i> 222 <sub>1</sub>                                                                                                     | <i>R</i> -3                                                                                                                                                                              |
| <i>a</i> /Å                                                     | 11.0674(9)                                                                                                                    | 11.0409(17)                                                                                                                   | 34.015(13)                                                                                                                                                                               |
| <i>b</i> /Å                                                     | 24.976(2)                                                                                                                     | 24.930(4)                                                                                                                     | 34.015(13)                                                                                                                                                                               |
| <i>c</i> /Å                                                     | 22.7050(18)                                                                                                                   | 22.688(4)                                                                                                                     | 8.9339(18)                                                                                                                                                                               |
| <i>α</i> /°                                                     | 90                                                                                                                            | 90                                                                                                                            | 90                                                                                                                                                                                       |
| <i>β</i> /°                                                     | 90                                                                                                                            | 90                                                                                                                            | 90                                                                                                                                                                                       |
| <i>γ</i> /°                                                     | 90                                                                                                                            | 90                                                                                                                            | 120                                                                                                                                                                                      |
| <i>V</i> /Å <sup>3</sup>                                        | 6276.1(9)                                                                                                                     | 6244.7(17)                                                                                                                    | 8952(7)                                                                                                                                                                                  |
| <i>Z</i>                                                        | 4                                                                                                                             | 4                                                                                                                             | 3                                                                                                                                                                                        |
| <i>T</i> /K                                                     | 200(2)                                                                                                                        | 200(2)                                                                                                                        | 200(2)                                                                                                                                                                                   |
| <i>F</i> (000)                                                  | 3648                                                                                                                          | 3648                                                                                                                          | 5472                                                                                                                                                                                     |
| <i>ρ</i> <sub>calcd</sub> /g cm <sup>-3</sup>                   | 1.967                                                                                                                         | 1.977                                                                                                                         | 2.069                                                                                                                                                                                    |
| <i>μ</i> (Mo Kα) /mm <sup>-1</sup>                              | 3.952                                                                                                                         | 3.972                                                                                                                         | 4.156                                                                                                                                                                                    |
| Crystal size /mm <sup>3</sup>                                   | 0.20×0.10×0.05                                                                                                                | 0.10×0.05×0.01                                                                                                                | 0.10×0.10×0.02                                                                                                                                                                           |
| Limiting indices                                                | −14 ≤ <i>h</i> ≤ 14,<br>−32 ≤ <i>k</i> ≤ 31,<br>−29 ≤ <i>l</i> ≤ 27                                                           | −14 ≤ <i>h</i> ≤ 14,<br>−31 ≤ <i>k</i> ≤ 32,<br>−29 ≤ <i>l</i> ≤ 29                                                           | −44 ≤ <i>h</i> ≤ 38,<br>−44 ≤ <i>k</i> ≤ 44,<br>−10 ≤ <i>l</i> ≤ 11                                                                                                                      |
| <i>R</i> <sub>1</sub> <sup>a</sup> ( <i>I</i> > 2σ( <i>I</i> )) | 0.029                                                                                                                         | 0.060                                                                                                                         | 0.058                                                                                                                                                                                    |
| <i>wR</i> <sub>2</sub> <sup>b</sup> (all data)                  | 0.074                                                                                                                         | 0.100                                                                                                                         | 0.109                                                                                                                                                                                    |
| GOF                                                             | 1.046                                                                                                                         | 1.054                                                                                                                         | 1.165                                                                                                                                                                                    |
| Flack parameter                                                 | 0.032(5)                                                                                                                      | 0.022(8)                                                                                                                      | —                                                                                                                                                                                        |
| CCDC No.                                                        | 1879442                                                                                                                       | 1879443                                                                                                                       | 1879444                                                                                                                                                                                  |

$$^a R_1 = (\sum(|F_o| - |F_c|)) / (\sum |F_o|)$$

$$^b wR_2 = [\{\sum w(F_o^2 - F_c^2)^2\} / (\sum w|F_o|^2)]^{1/2}$$



**Table S4.** Crystallographic data for  $[\text{CdCl}\{\text{Co}(\text{D-ebp})\}]_n$  and  $\text{D}_3\text{L}_3\text{-2Cl}$ .

|                                         | $[\text{Cd}_2\text{Cl}_2(\text{H}_2\text{O})\{\text{Co}(\text{D-ebp})\}_2] \cdot 14.5\text{H}_2\text{O}$<br>$([\text{CdCl}\{\text{Co}(\text{D-ebp})\}]_n)$ | $[\text{Cd}_6(\text{H}_2\text{O})_6\{\text{Co}(\text{D-ebp})\}_3\{\text{Co}(\text{L-ebp})\}_3\text{Cl}_6] \cdot 12\text{H}_2\text{O}$<br>$(\text{D}_3\text{L}_3\text{-2Cl})$ |
|-----------------------------------------|------------------------------------------------------------------------------------------------------------------------------------------------------------|------------------------------------------------------------------------------------------------------------------------------------------------------------------------------|
| Formula                                 | $\text{C}_{24}\text{H}_{71}\text{Cd}_2\text{Cl}_2\text{Co}_2\text{N}_4\text{O}_{23.5}\text{S}_4$                                                           | $\text{C}_{72}\text{H}_{156}\text{Cd}_6\text{Co}_6\text{N}_{12}\text{O}_{42}\text{S}_{12}$                                                                                   |
| Colour, form                            | purple, block                                                                                                                                              | purple, hexagonal plate                                                                                                                                                      |
| $M$                                     | 1333.64                                                                                                                                                    | 3717.95                                                                                                                                                                      |
| Crystal system                          | Tetragonal                                                                                                                                                 | Trigonal                                                                                                                                                                     |
| Space group                             | $P4_12_12$                                                                                                                                                 | $R\bar{3}$                                                                                                                                                                   |
| $a/\text{\AA}$                          | 17.911(3)                                                                                                                                                  | 34.015(13)                                                                                                                                                                   |
| $b/\text{\AA}$                          | 17.911(3)                                                                                                                                                  | 34.015(13)                                                                                                                                                                   |
| $c/\text{\AA}$                          | 31.795(3)                                                                                                                                                  | 8.9339(18)                                                                                                                                                                   |
| $\alpha/^\circ$                         | 90                                                                                                                                                         | 90                                                                                                                                                                           |
| $\beta/^\circ$                          | 90                                                                                                                                                         | 90                                                                                                                                                                           |
| $\gamma/^\circ$                         | 90                                                                                                                                                         | 120                                                                                                                                                                          |
| $V/\text{\AA}^3$                        | 10199(4)                                                                                                                                                   | 8952(7)                                                                                                                                                                      |
| $Z$                                     | 8                                                                                                                                                          | 3                                                                                                                                                                            |
| $T/\text{K}$                            | 200(2)                                                                                                                                                     | 200(2)                                                                                                                                                                       |
| $F(000)$                                | 5432                                                                                                                                                       | 5472                                                                                                                                                                         |
| $\rho_{\text{calcd}}/\text{g cm}^{-3}$  | 1.737                                                                                                                                                      | 2.069                                                                                                                                                                        |
| $\mu(\text{Mo K}\alpha)/\text{mm}^{-1}$ | 1.806                                                                                                                                                      | 4.156                                                                                                                                                                        |
| Crystal size $/\text{mm}^3$             | $0.05 \times 0.05 \times 0.02$                                                                                                                             | $0.10 \times 0.10 \times 0.02$                                                                                                                                               |
| Limiting indices                        | $-22 \leq h \leq 23,$<br>$-23 \leq k \leq 18,$<br>$-41 \leq l \leq 41$                                                                                     | $-44 \leq h \leq 38,$<br>$-44 \leq k \leq 44,$<br>$-10 \leq l \leq 11$                                                                                                       |
| $R_1^a (I > 2\sigma(I))$                | 0.045                                                                                                                                                      | 0.058                                                                                                                                                                        |
| $wR_2^b$ (all data)                     | 0.126                                                                                                                                                      | 0.109                                                                                                                                                                        |
| GOF                                     | 1.082                                                                                                                                                      | 1.165                                                                                                                                                                        |
| Flack parameter                         | 0.018(5)                                                                                                                                                   | —                                                                                                                                                                            |
| CCDC No.                                | 1879445                                                                                                                                                    | 1879446                                                                                                                                                                      |

$$^a R_1 = (\sum(|F_o| - |F_c|))/(\sum|F_o|)$$

$$^b wR_2 = [\{\sum w(F_o^2 - F_c^2)^2\}/(\sum w|F_o|^2)]^{1/2}$$
